# Supplementary material for: TSS-EMOTE, a refined protocol for a more complete and less biased global mapping of transcription start sites in bacterial pathogens
Source: PubMed Central journal article supplement (PMC5094136; doi:10.1186/s12864-016-3211-3), 2016-11-02

*S. aureus* RPMI

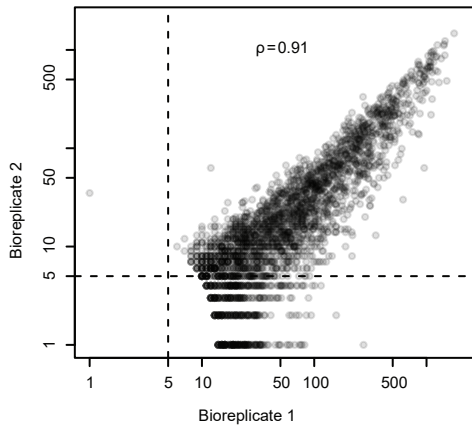

*S. epidermidis*

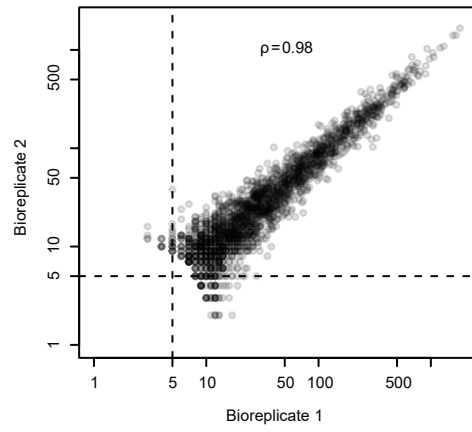

*A. baumannii*

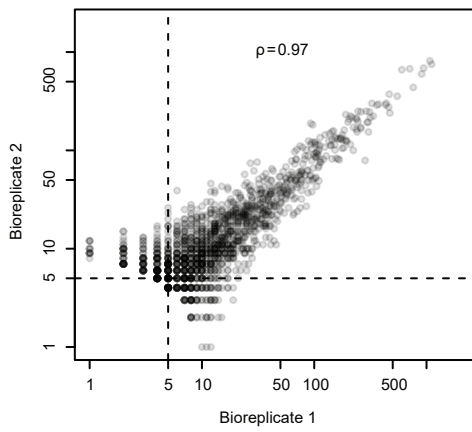

*E. aerogenes*

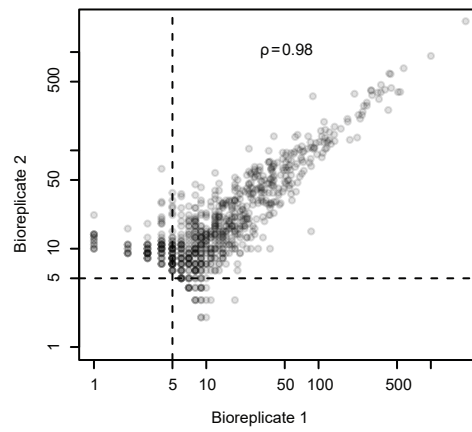

*S. aureus* MH\_agar 37°C

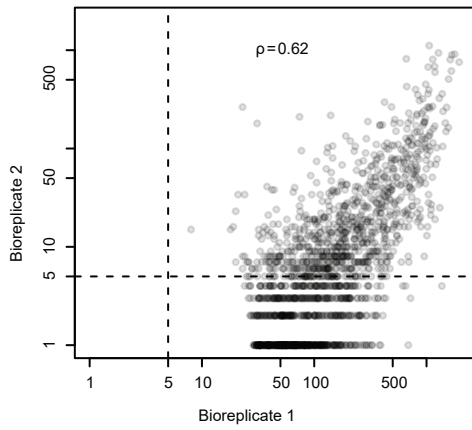

*S. aureus* MH 37°C

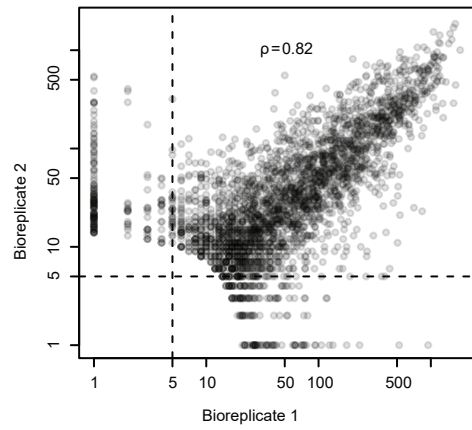

*S. aureus* MH 30°C

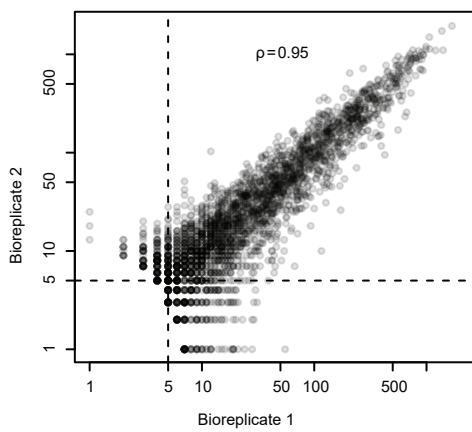

Supplement: 12864_2016_3211_MOESM6_ESM.pdf [file 12864_2016_3211_MOESM6_ESM.pdf]
