# Supplementary material for: TSS-EMOTE, a refined protocol for a more complete and less biased global mapping of transcription start sites in bacterial pathogens
Source: PubMed Central journal article supplement (PMC5094136; doi:10.1186/s12864-016-3211-3), 2016-11-02

**A**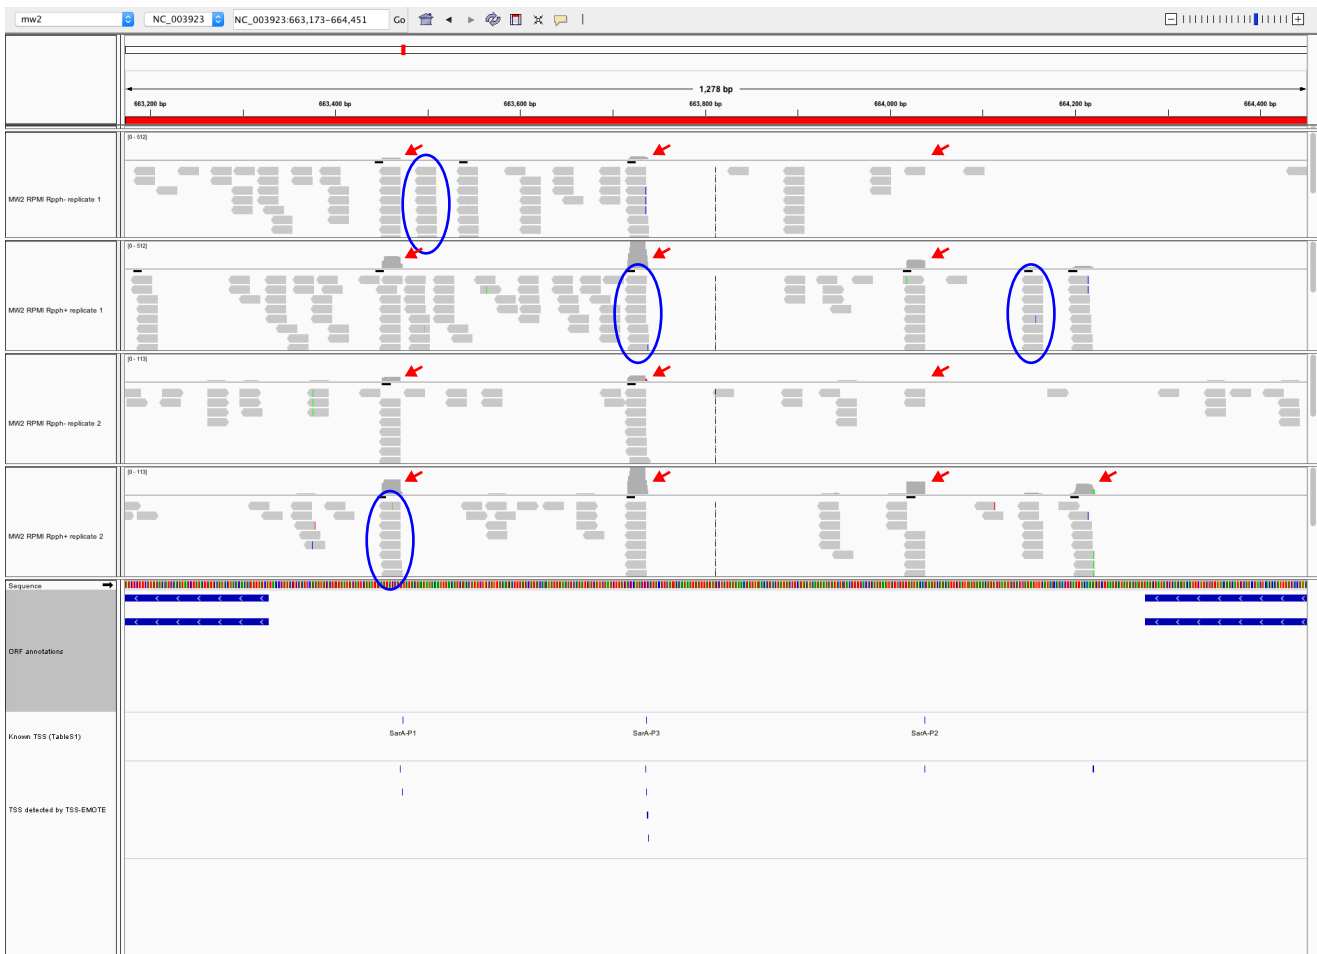**B*****S. aureus* RPMI**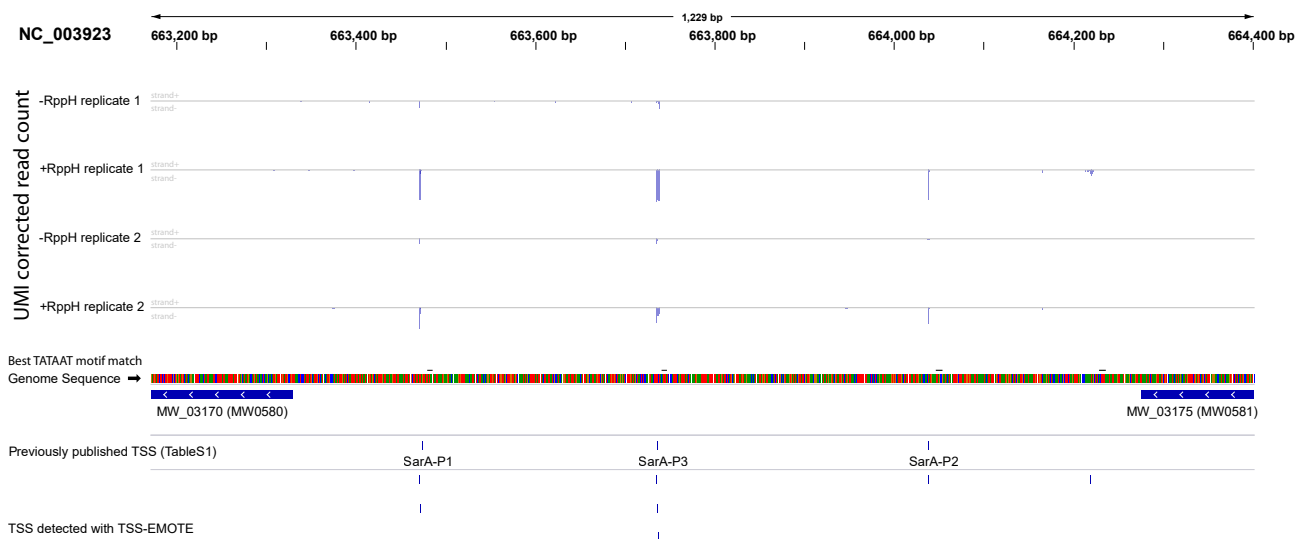

Supplement: 12864_2016_3211_MOESM8_ESM.pdf [file 12864_2016_3211_MOESM8_ESM.pdf]
